# Supplementary material for: Imidazo[1,2-b]pyrazole-7-carboxamides Induce Apoptosis in Human Leukemia Cells at Nanomolar Concentrations
Source: MDPI journal article supplement (doi:10.3390/molecules23112845), 2018-11-01

**Figure S7. Dose-response curves of imidazo[1,2-*b*]pyrazole-7-carboxamides on human primary fibroblast cells**

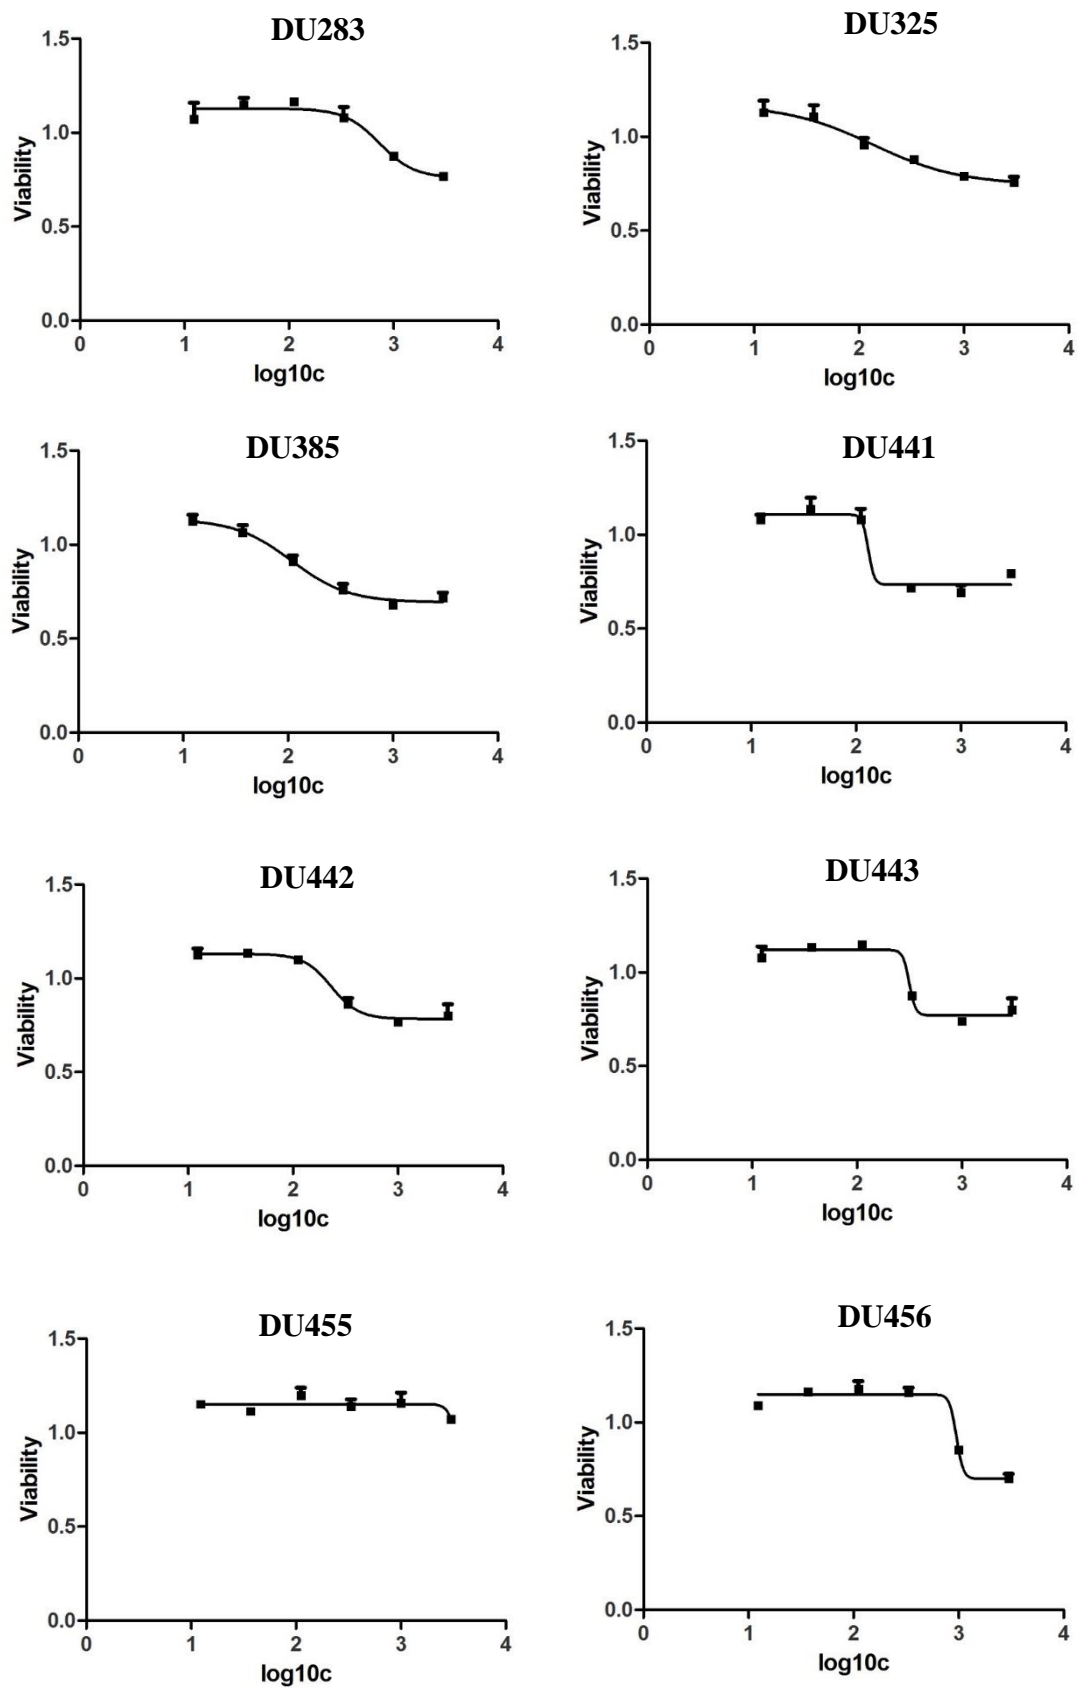

Supplement: s1 [file s1]
