# Supplementary material for: Imidazo[1,2-b]pyrazole-7-carboxamides Induce Apoptosis in Human Leukemia Cells at Nanomolar Concentrations
Source: MDPI journal article supplement (doi:10.3390/molecules23112845), 2018-11-01

**Figure S8. Dose-response curves of imidazo[1,2-*b*]pyrazole-7-carboxamides on murine (4T1) and human (MCF7) breast cancer cells grown as a monolayer (2D) or spheroid (3D) (3D)**

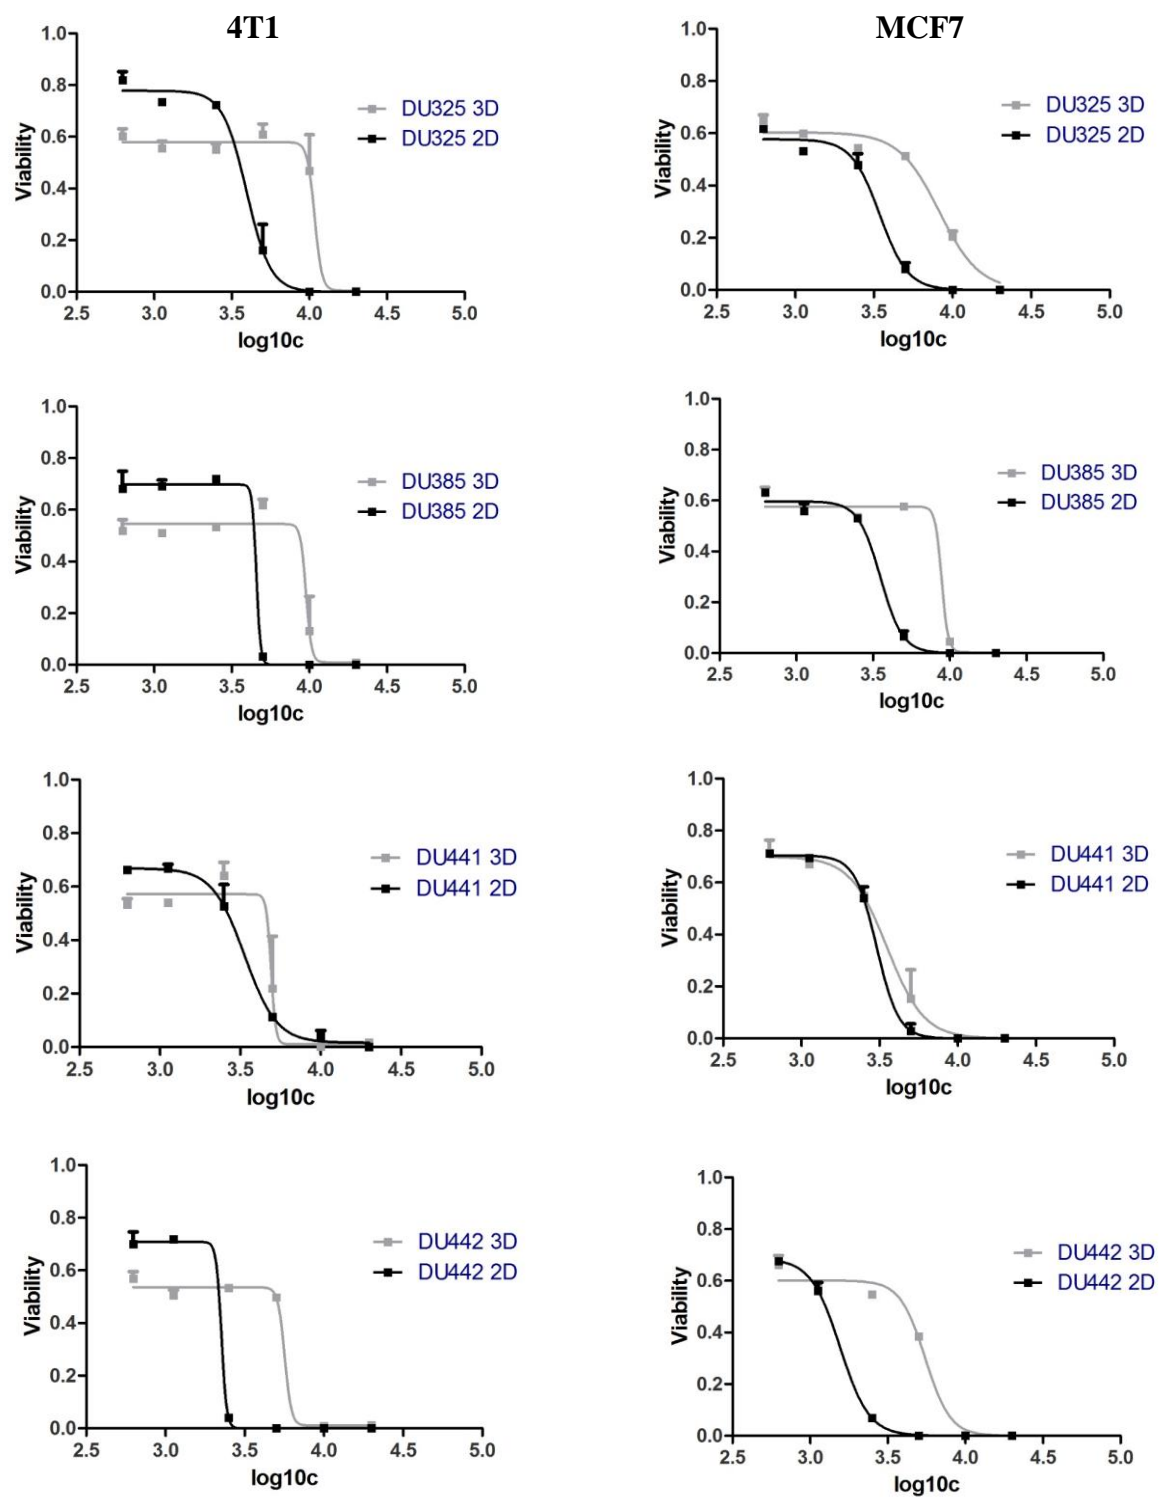

Supplement: s1 [file s1]
